# Supplementary material for: Simulation of a thermo-electrochemical cell with graphite rod electrodes
Source: Royal Society of Chemistry journal article supplement (doi:10.1039/d3ra01463k), 2023-01-01
Supplement: d3ra01463k1.pdf [file d3ra01463k1.pdf]

**Supplementary Information:**

**Simulation of thermo-electrochemical cell with graphite rod electrodes**

Jili Zheng <sup>a</sup>, Jun Li <sup>a,b,\*</sup>, Liang Zhang <sup>a,b</sup>, Yang Yang <sup>a,b</sup>

<sup>a</sup> *Institute of Engineering Thermophysics, Chongqing University, Chongqing 400030, China*

<sup>b</sup> *Key Laboratory of Low-grade Energy Utilization Technologies and Systems, Chongqing University, Ministry of Education, Chongqing 400030, China*

\*Corresponding author. Tel.: +86-23-6510-2474; fax: +86-23-6510-2474; E-mail address: lijun@cqu.edu.cn (J. Li).

### Experiment Section:

Potassium ferricyanide, potassium ferrocyanide, sodium sulfate, anhydrous ethanol, acetone were purchased from Tianjin Guangfu Co., Ltd. Sodium acetate were purchased from Shanghai Aladdin Reagent Co., Ltd. Graphite rod (99.9 %) was purchased from Shanghai Carbon Factory. All chemical reagents were of analytical grade without the need for further purification before use.

The voltage-current density curve of TEC was drawn by adjusting the resistance box from 5 to 10000  $\Omega$  at 0.4 mol/L  $\text{Fe}(\text{CN})_6^{4-}/\text{Fe}(\text{CN})_6^{3-}$  and temperature difference 20  $^{\circ}\text{C}$ . The power density of the TEC was calculated according to Eq. (1):

$$P = UI/A \quad (1)$$

Where  $A$  is the anodes project area,  $I$  and  $U$  the sustainable current and cell voltage after the TEC reached steady-state, respectively.

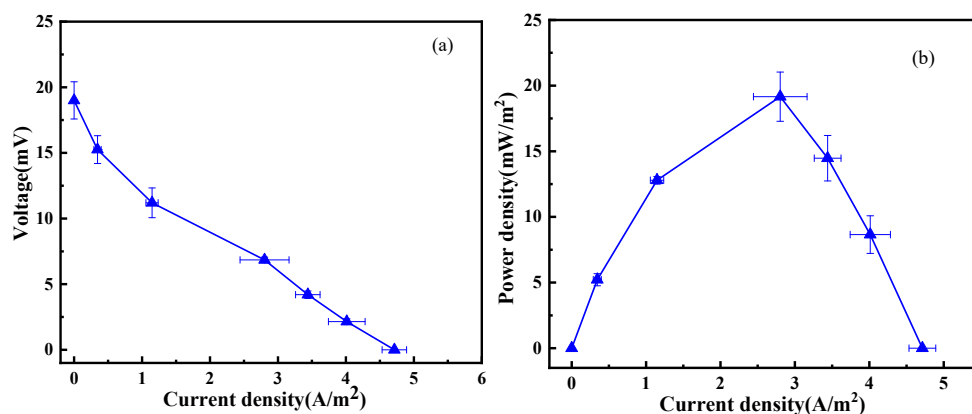

**Fig.S1** (a) Polarization and (b) power density curve of the TEC with graphite rod electrodes.

**Table S1 Model parameters for TEC simulation.**

| Parameter (Units)                                                               | Value                                                      |
|---------------------------------------------------------------------------------|------------------------------------------------------------|
| Cell diameter (mm)                                                              | 7                                                          |
| Cell length (mm)                                                                | 20                                                         |
| Density (kg m <sup>-3</sup> ) [1]                                               | $\rho=1063+0.546\times T-0.00147\times T^2$                |
| Diffusion coefficient (m <sup>2</sup> s <sup>-1</sup> ) [1]                     | $(62.66-0.5336T+1.1482 \times 10^{-3}T^2) \times 10^{-10}$ |
| Electrolyte density reference at 300 K (kg m <sup>-3</sup> ) [1]                | $\rho_0=1094.6$                                            |
| Charge transfer coefficient [2]                                                 | 0.5                                                        |
| Electrode thermal conductivity (W m <sup>-1</sup> K <sup>-1</sup> ) [3]         | $k_s=0.6$                                                  |
| Number of electrons transferred [4]                                             | 1                                                          |
| Anode temperature (K)                                                           | 320                                                        |
| Cathode temperature (K)                                                         | 300                                                        |
| Initial K <sub>3</sub> Fe(CN) <sub>6</sub> concentration (mol m <sup>-3</sup> ) | 200                                                        |
| Initial K <sub>4</sub> Fe(CN) <sub>6</sub> concentration (mol m <sup>-3</sup> ) | 200                                                        |
| Electrolyte heat capacity (J kg <sup>-1</sup> K <sup>-1</sup> ) [1]             | $C_p=4187$                                                 |
| exchange current density (mA cm <sup>-2</sup> ) [5]                             | 7.6                                                        |
| electron transfer coefficient ( $\alpha$ )                                      | 0.5                                                        |
| electron transfer coefficient ( $\beta$ )                                       | 0.5                                                        |
| Thermal-to-voltage conversion (mV K <sup>-1</sup> ) [6]                         | 1.5                                                        |

[1] Sarac, H, Patrick MA, Wragg AA (1993) Physical properties of the ternary electrolyte potassium ferri-ferrocyanide in aqueous sodium hydroxide solution in the range 10–90 °C. J Appl Electrochem 23(1):51–55. I

[2] Spiro M (1964) Standard exchange current densities of redox systems at platinum electrodes. Electrochimica Acta 9(11):1531–1537

[3] keshoji T, Kimura S, de Nahui FNB, Yoneya M (1991) Computer analysis of natural convection in thin-layer thermocells with a soluble redox couple: Part 1. Method and the unsteady problem. J Electroanal Chem 307(1–2):29–45.

[4] Daum PH, Enke CG (1969) Electrochemical kinetics of the ferriferrocyanide couple on platinum. Anal Chem 41(4):653–656.

[5] Kim, J. H., Kang, T. J. (2019). Diffusion and current generation in porous electrodes for thermo-electrochemical cells. ACS applied materials interfaces, 11(32), 28894-28899.

[6] Salazar PF, Kumar S, Cola BA (2012) Nitrogen-and boron-doped carbon nanotube electrodes in a thermo-electrochemical cell. J Electrochem Soc 159(5):B483–B488.
